# Supplementary material for: Direct synthesis of superlong Pt|Te mesoporous nanotubes for electrocatalytic oxygen reduction
Source: Royal Society of Chemistry journal article supplement (doi:10.1039/c8ta10544h), 2019-01-01
Supplement: c8ta10544h1.pdf [file c8ta10544h1.pdf]

**Supporting Information for**

**Direct synthesis of superlong Pt|Te mesoporous nanotubes for  
electrocatalytic oxygen reduction**

Hongjing Wang, Shuli Yin, Chunjie Li, Kai Deng, Ziqiang Wang, You Xu, Xiaonian Li,

Hairong Xue,\* and Liang Wang\*

State Key Laboratory Breeding Base of Green-Chemical Synthesis Technology,  
College of Chemical Engineering, Zhejiang University of Technology, Hangzhou,  
Zhejiang 310014, P.R. China.

E-mail: xuehairong@zjut.edu.cn; wangliang@zjut.edu.cn

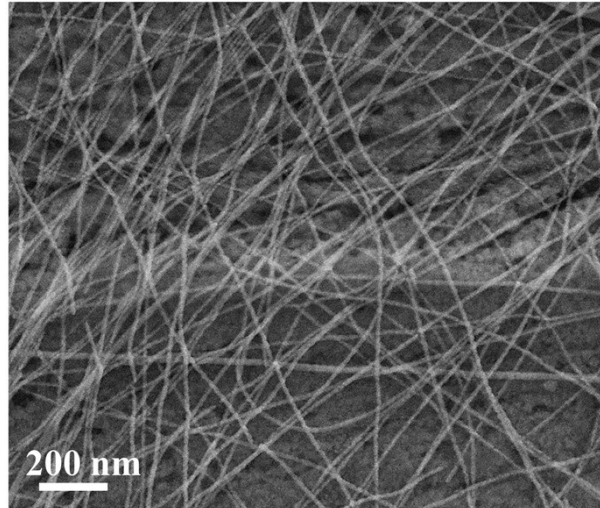

**Fig. S1** SEM image of the Te NWs.

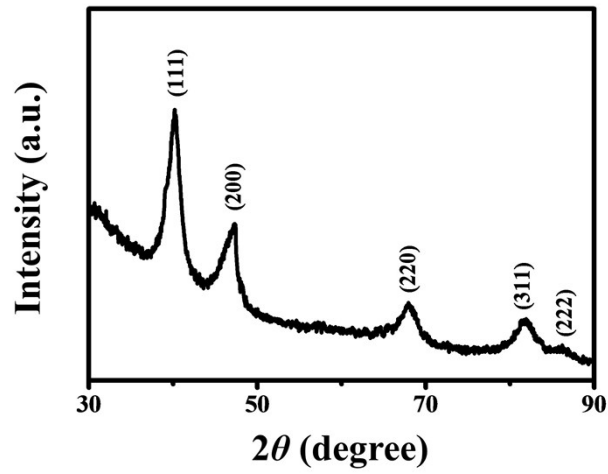

**Fig. S2** XRD pattern of the Pt|Te MNTs.

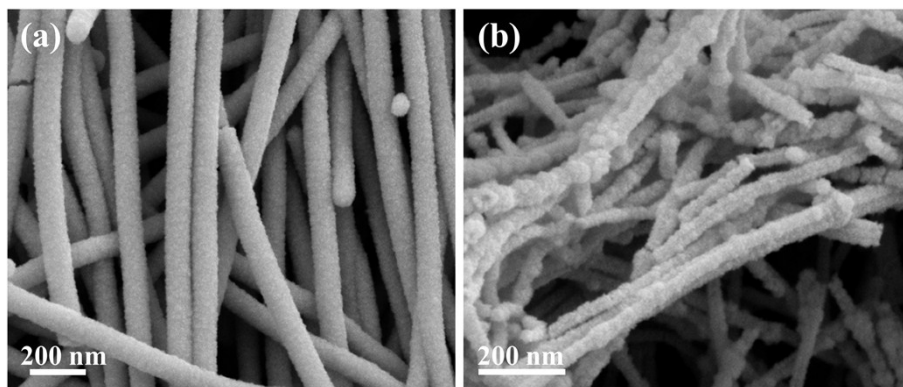

**Fig. S3** SEM images of the Pt|Te NTs prepared (a) with PVP and (b) without F127 under the typical synthesis condition.

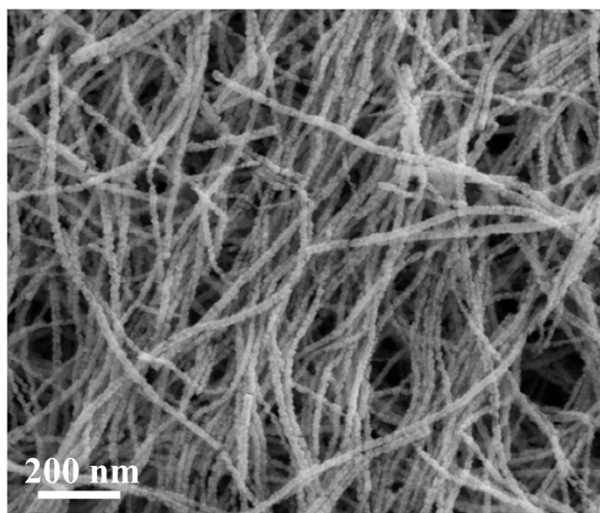

**Fig. S4** SEM images of the Pt|Te NTs prepared without AA under the typical synthesis condition.

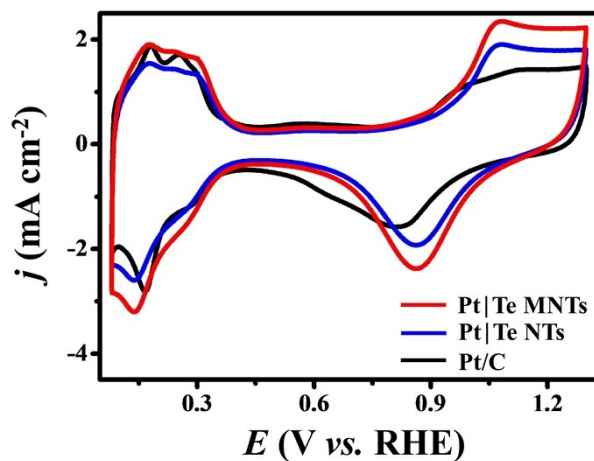

**Fig. S5** CVs of the catalysts recorded in a  $N_2$ -saturated 0.1 M  $HClO_4$  solution at a sweep rate of  $50 \text{ mV s}^{-1}$ .

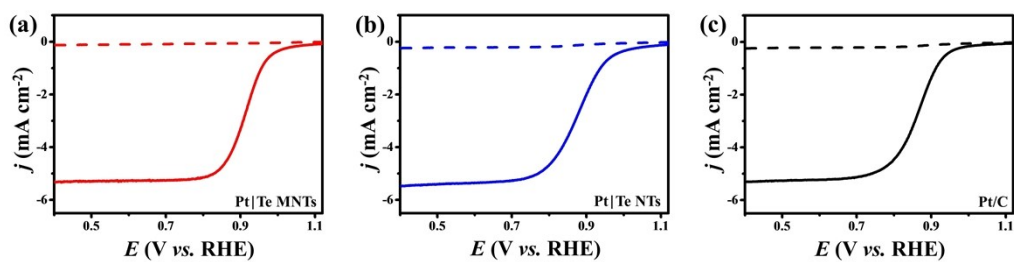

**Fig. S6** LSVs of the samples in  $N_2$ -saturated (dotted line) and  $O_2$ -saturated (solid line) 0.1 M  $HClO_4$ : (a) Pt|Te MNTs, (b) Pt|Te NTs, and (c) Pt/C.

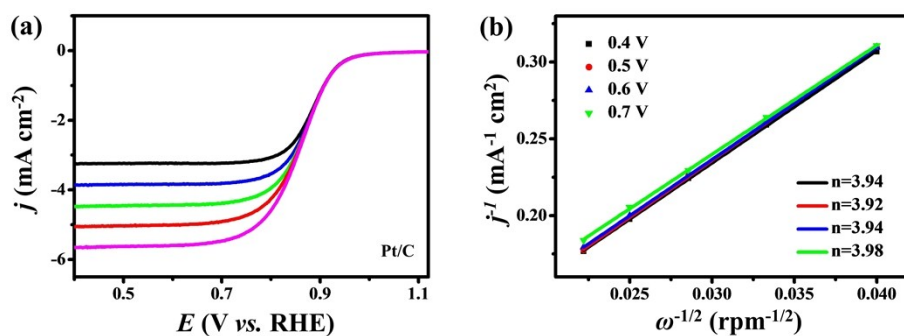

**Fig. S7** (a) ORR polarization curves of the Pt/C with different RDE rotation rates. (b)

The electron transfer numbers at different potentials.

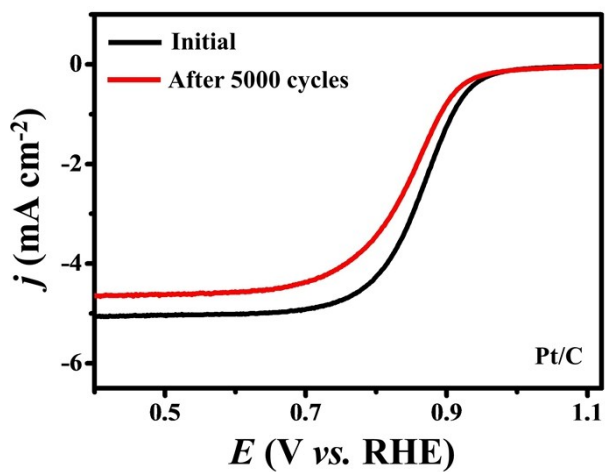

**Fig. S8** The ORR polarization curves before and after durability test for commercial Pt/C.

**Table S1.** The comparisons of the ORR performance of the Pt|Te MNTs with the recently reported Pt-based catalysts.

| <b>Catalyst</b>                        | <b><math>E_{onset}</math> (V vs. RHE)</b> | <b><math>E_{1/2}</math> (V vs. RHE)</b> | <b>Ref.</b> |
|----------------------------------------|-------------------------------------------|-----------------------------------------|-------------|
| Pt Te MNTs                             | 1.00                                      | 0.92                                    | This work   |
| Porous PtAg hollow chain-like networks | 0.933                                     | 0.857                                   | 1           |
| PtAu nanoparticles                     | 0.98                                      | 0.83                                    | 2           |
| PtCo nanomyriapods                     | 0.92                                      | 0.82                                    | 3           |
| Nanoporous Pt                          | 0.85                                      | /                                       | 4           |
| Pt nanoparticles                       | 0.85                                      | /                                       | 5           |
| PtPd networks                          | 0.89                                      | /                                       | 6           |
| MCS Au@PtNi NPs                        | /                                         | 0.838                                   | 7           |
| Dodecahedral CuPt nanoframes           | /                                         | 0.87                                    | 8           |

## References

- [1] A. Wang, L. Liu, X. Lin, J. Yuan and J. Feng, *Electrochim. Acta*, **2017**, *245*, 883–892.
- [2] W. Wu, Z. Tang, K. Wang, Z. Liu, L. Li and S. Chen, *Electrochim. Acta*, **2018**, *260*, 168–176.
- [3] L. Jiang, X. Huang, A. Wang, X. Li, J. Yuag and J. Feng, *J. Mater. Chem. A*, **2017**, *5*, 10554–10560.
- [4] B. Geboes, J. Ustarroz, K. Sentosun, H. Vanrompay, A. Hubin, S. Bals and T. Breugelmans, *ACS Catal.*, **2016**, *6*, 5856–5864.
- [5] R. Devivaraprasad, R. Ramesh, N. Naresh, T. Kar, R. Singh and M. Neergat, *Langmuir*, **2014**, *30*, 8995–9006.
- [6] Y. Shi, L. Mei, A. Wang, T. Yuan, S. Chen and J. Feng, *J. Colloid Interf. Sci.*, **2017**, *504*, 363–370.
- [7] Q. Shi, C. Zhu, S. Fu, D. Du and Y. Lin, *ACS Appl. Mater. Interfaces*, **2016**, *8*, 4739–4744.
- [8] L. Lyu, Y. Kao, D. Cullen, B. Sneed, Y. Chuang and C. Kuo, *Chem. Mater.*, **2017**, *29*, 5681–5692.
